# Supplementary material for: Direct access to the graphene–metal interface using Raman spectroscopy to study the origin of contact resistance in operational devices
Source: Royal Society of Chemistry journal article supplement (doi:10.1039/d5na00846h), 2025-01-01
Supplement: d5na00846h1.pdf [file d5na00846h1.pdf]

## Supplementary Material for

# Direct access to graphene-metal interface by Raman spectroscopy for study the origin of contact resistance in operational devices

Alessandro Kovtun<sup>1\*</sup>, Leonardo Martini<sup>2</sup>, Piera Maccagnani<sup>3\*</sup>

<sup>1</sup> Consiglio Nazionale delle Ricerche, Istituto per la Sintesi Organica e la Fotoreattività, (CNR-ISOF), 40129 Bologna, Italy, <sup>2</sup>Dipartimento di Scienze Fisiche, Informatiche e Matematiche (FIM), Università di Modena e Reggio Emilia, 41125 Modena, Italy, <sup>3</sup> Consiglio Nazionale delle Ricerche, Istituto per lo Studio dei Materiali Nanostrutturati, (CNR-ISMN), 40129 Bologna, Italy.

\* Corresponding authors: Alessandro Kovtun, [alessandro.kovtun@cnr.it](mailto:alessandro.kovtun@cnr.it); Piera Maccagnani, [piera.maccagnani@cnr.it](mailto:piera.maccagnani@cnr.it)

## Content

|                                           |   |
|-------------------------------------------|---|
| Electrical Characterization .....         | 1 |
| Contact End Resistance (RCE) method ..... | 2 |
| Raman spectra and maps .....              | 4 |

## Electrical Characterization

The DC characterization was carried out at wafer level in a Karl-Süss probe station, in ambient atmosphere (300 K, relative humidity of 40%), using four Keithley 238 (Keithley Instruments, Inc., Cleveland, OH, USA) source monitor units (SMU) connected to the probe through the switching matrix Keithley 707 (with 7072 and 7174 semiconductor cards).

## Contact End Resistance (RCE) method

The TLM structures have been fabricated with two lithographic steps: the first step is for the patterning of the graphene structures, and the second one is for the definition of metal elements (contacts and pads). The extraction of ohmic contact parameters using TLM structures was performed plotting the total resistance  $R_T$  vs. the contact separation ( $L_{CH}$ ), together with the  $R_{CE}$  measurements. The measurement setup used for the application of the CER method to the TLM test structures, is shown in Fig. SI 1. All the  $I$ - $V$  measurements are linear (Fig. 1e) and  $R_T$  can be written as: <sup>3</sup>

$$R_T = \frac{V_{12}}{I_{12}} = R_{sh} \frac{L_{CH}}{W} + 2R_{CF} + 2R_M \quad [S1]$$

where  $R_{sh}$  is the sheet resistance of the graphene channel,  $R_{CF}$  is the contact front resistance related to the metal/graphene stack, and  $R_M$  is the series resistance due to the metal and can be neglected because  $R_M \ll R_{CF}$ .  $R_{CF}$  was obtained applying the extrapolation technique to  $R_T$  vs  $L_{CH}$  curve, as reported in the example in Fig. SI 2, where the measured  $R_T$  is reported for the different width of the graphene in the TLM structures.

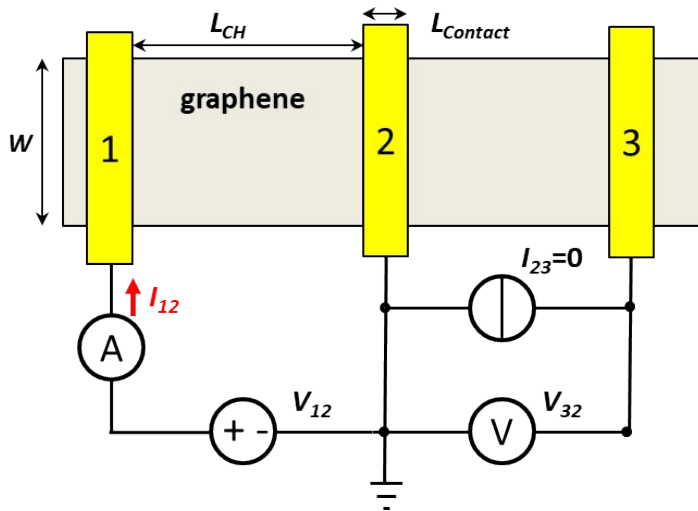

**Figure S1.** Measurement setup for TLM structures

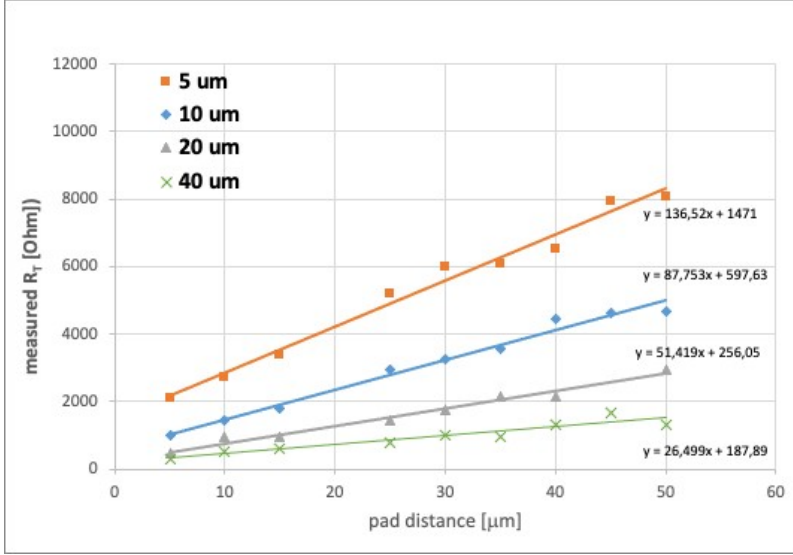

**Figure S2.** Plot of  $R_T$  vs. the pad distance,  $L_{CH}$ , for different width of the graphene stripe,  $W$ . The metal contacts are all 6 mm wide, while their length is the same as the graphene stripe ( $W$ ). The slope of the fitting provides  $R_{SH}$ , and the intercept of the fitting straight line on the y-axis ( $R_T$ ) provides the front-end contact resistance ( $2R_{CF}$ ), while the intercept on the x-axis yields  $2L_{TK} \times (R_{SK}/R_{SH})$ .

As explained in ref. <sup>4</sup>, the contact front resistance  $R_{CF}$  can be modeled by means of a distributed  $R$ - $R$  transmission line model, and neglecting the resistance related to the transport into the metal (for its very low metal resistivity),  $R_{CF}$  can be shown to be equal to:

$$R_{CF} = \frac{R_{SK} \times L_{TK}}{W_{CH}} \coth \frac{L_{CON}}{L_{TK}} \quad [S2]$$

where  $L_{TK}$  is expressed as:

$$L_{TK} = \sqrt{\frac{\rho_C}{R_{SK}}} \quad [S3]$$

To evaluate  $\rho_C$  the contact end measurement technique should be applied to TLM structures. <sup>4</sup> This method consists in imposing a null current between contacts 2 and 3 ( $I_{23} = 0$ ) during the measurements of  $I_{12}$ , so that the voltage  $V_{32}$  drops across the metal/graphene stack at the border of contact 2 (where the current is vanishing), and the contact-end resistance can be expressed as:

$$R_{CE} = \frac{V_{32}}{I_{12}} = \frac{\rho_C}{L_{TK} \times W_{CH}} \times \frac{1}{\sinh(L_{CON}/L_{TK})} \quad [S4]$$

And exploiting eqs. [S2], [S3] and [S4] is obtained that:

$$\frac{R_{CF}}{R_{CE}} = \cosh \left( \frac{L_{CON}}{L_{TK}} \right) \quad [S5]$$

Therefore, using the experimental data for  $R_{CF}$  and  $R_{CE}$  and the equations above it's possible to extract the value for  $L_{TK}$ ,  $\rho_C$  and  $R_{SK}$ . The values obtained are reported in Table 1 of the main paper.

Fig. SI 3 shows the experimental values extracted from CER measurements, for  $R_{CF}$  and  $R_{CE}$  as a function of the graphene width of the TLM structures (the reported data are averaged over several TLM structures). As expected from equations S2 and S4, both  $R_{CF}$  and  $R_{CE}$  scale inversely with  $W$ .

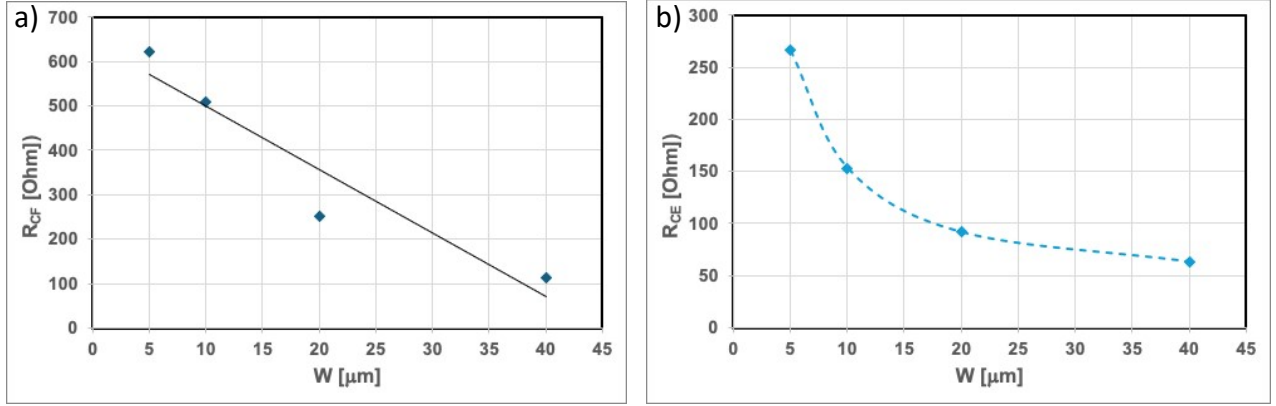

**Fig. S3.** (a) contact front resistance ( $R_{CF}$ ) and (b) contact-end resistance ( $R_{CE}$ ) as a function of the width of the graphene in the TLM structures.

## Raman spectra and maps

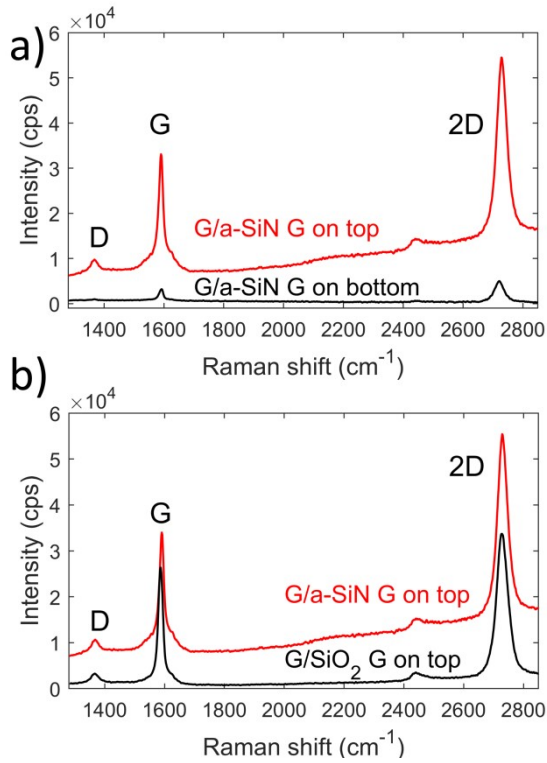

**Figure S4.** Representative Raman spectra for graphene on transparent substrate (G/a-SiN) with a) measurements performed on the top (conventional set-up, red curve) and with device flipped upside down (graphene on bottom, black curve); b) graphene on SiO<sub>2</sub> (black curve) and a-SiN (red curve).

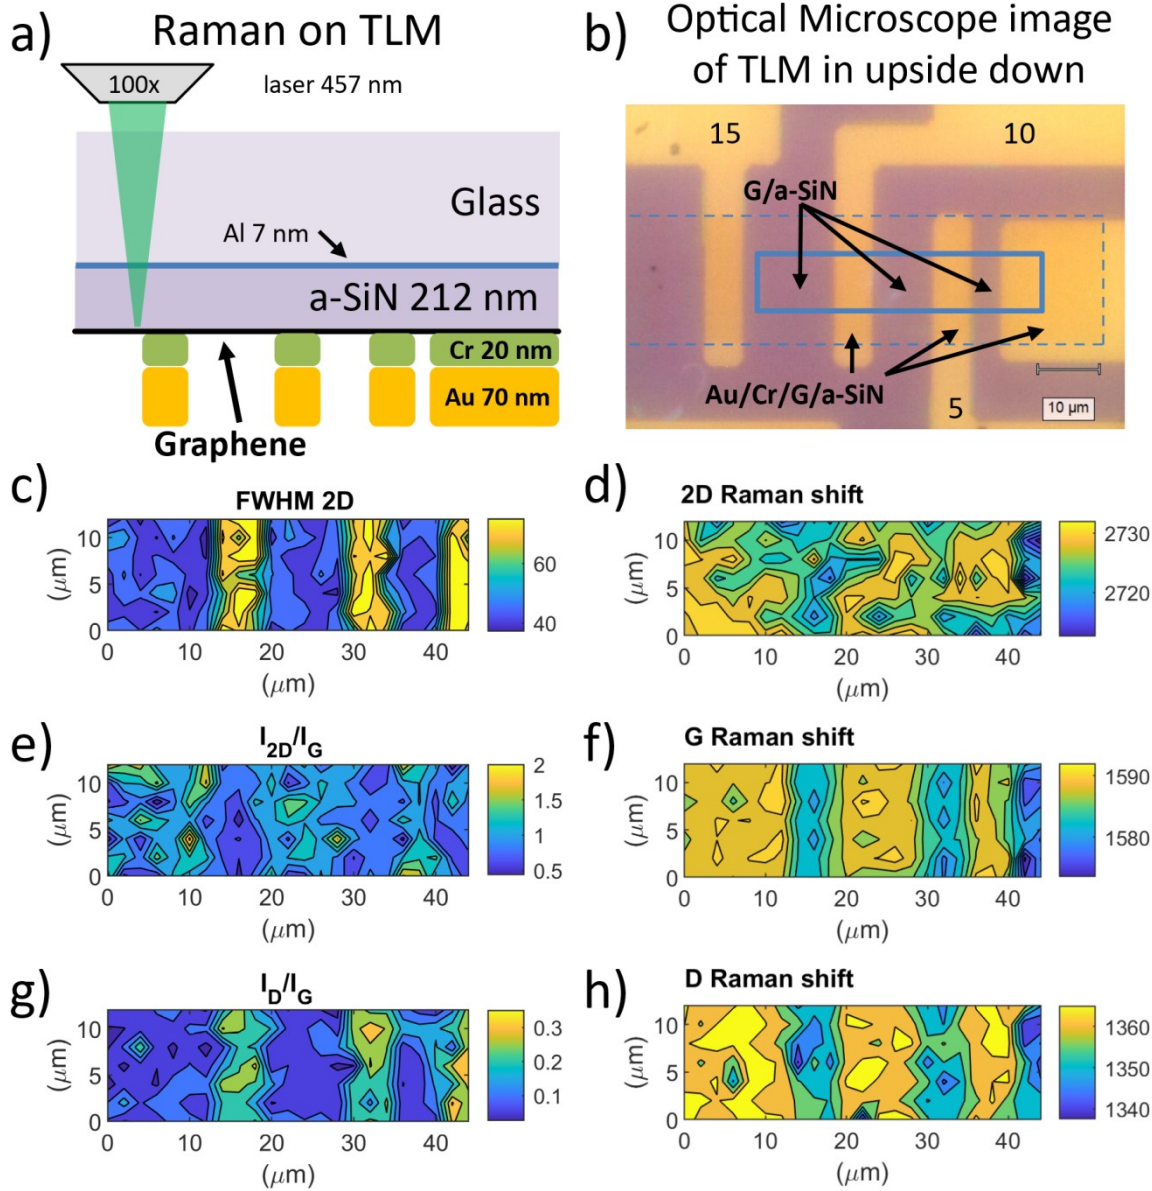

**Figure S5.** a) Scheme of the Raman measurement set-up of the graphene on transparent substrate and in upside down configuration, b) microscopy image of TLM test structure with 3 metallic contact (Au/Cr/G/a-SiN) separated by 3 channels (15, 10 and 5  $\mu\text{m}$  channel length) where graphene is without metallic contact (G/a-SiN), the solid line rectangle represents the area of the sample probed by micro Raman, while the dashed lines underline the edges of the graphene; Raman maps of intensities of c) FWHM of 2D, e)  $I_{2D}/I_G$ , and g)  $I_D/I_G$ . Raman maps of d) 2D, f) G and h) D bands.

#### Bibliography

- <sup>1</sup> P. Maccagnani, Università di Ferrara, 2023 <https://hdl.handle.net/11392/2506194>.
- <sup>2</sup> A. J. Pollard, K. R. Paton, C. A. Clifford, and E. Legge, in *Good Practice Guide* (National Physical Laboratory, UK, 2017), Vol. 145.
- <sup>3</sup> S. Venica, F. Driussi, A. Gahoi, P. Palestri, M. C. Lemme, and L. Selmi, "On the adequacy of the transmission line model to describe the graphene-metal contact resistance", *IEEE Transactions on Electron Devices* **65** (4), 1589 (2018).
- <sup>4</sup> G. Reeves and H. Harrison, "Obtaining the specific contact resistance from transmission line model measurements", *IEEE Electron device letters* **3** (5), 111 (1982).
